# Supplementary material
Source: MDPI journal article supplement (https://www.mdpi.com/2073-4395/12/2/359)
Supplement: s1 [file s1]

## Correlational analysis of agronomic and seed quality traits in *Camelina sativa* doubled haploid lines under rain-fed condition

Jahad Soorni<sup>1\*</sup>, Zahra Sadat Shobbar<sup>1</sup>, Danial Kahrizi<sup>2</sup>, Federica Zanetti<sup>3</sup>, Kaveh Sadeghi<sup>4</sup>, Sara Rostampour<sup>5</sup>, Péter Gergő Kovács<sup>6</sup>, Attila Kiss<sup>7</sup>, Iman Mirmazloun<sup>8\*</sup>

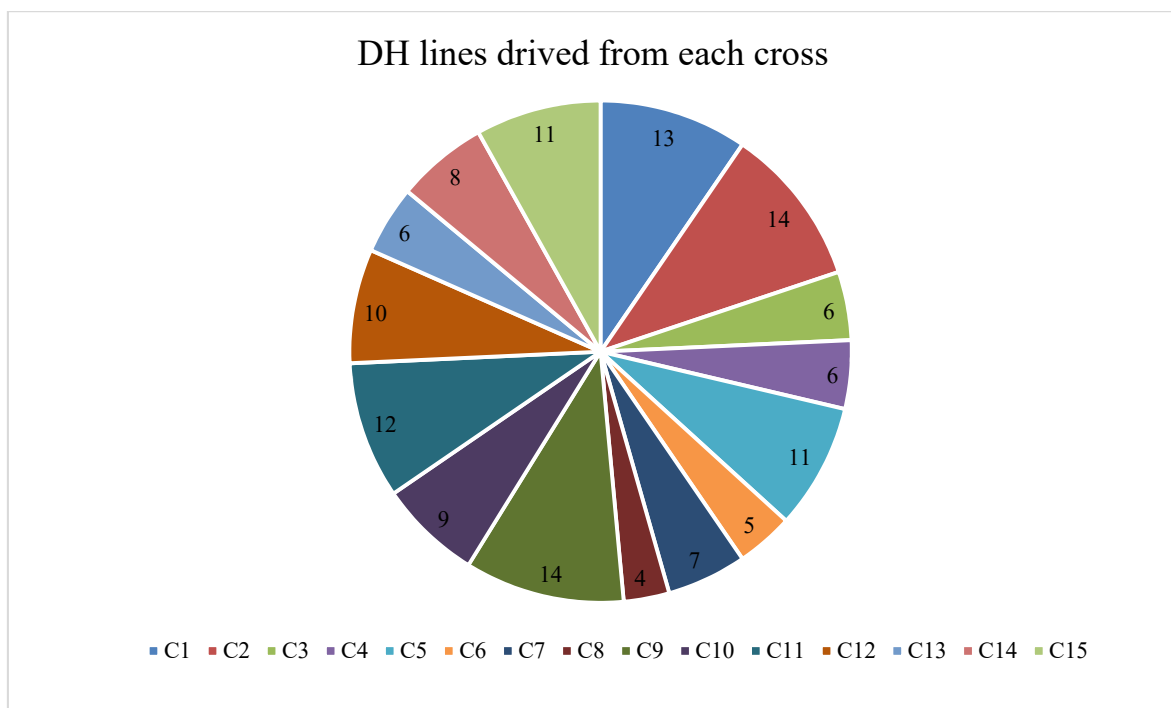

**Figure S1.** Proportion of the DH lines derived from each cross in 136 DH lines.

C1 to C15 represent cross numbers and number of DH lines in each cross showed in the pie chart.

**Table S1**

List of camelina cultivars used as parents in the crosses for production of DH lines.

| Cross No. | Maternal parent (♀) | Origin  | Paternal parent (♂) | Origin              | DH lines                                                                                         |
|-----------|---------------------|---------|---------------------|---------------------|--------------------------------------------------------------------------------------------------|
| 1         | Voronezskij 349     | Russian | Kirgizskij 1        | Kyrgyzstan          | DH001, DH002, DH005, DH037, DH051, DH062, DH070, DH073, DH077, DH086, DH087, DH093, DH096        |
| 2         | Omskij Mestnyj      | Russia  | Irkutskij Mestnyj   | Irkutsk Region      | DH003, DH006, DH009, DH032, DH038, DH043, DH046, DH060, DH071, DH079, DH089, DH113, DH118, DH129 |
| 3         | Przybrodzka         | Poland  | Hoga                | Denmark             | DH007, DH014, DH017, DH020, DH022, DH104                                                         |
| 4         | Saratouskij         | Russia  | Bronowska           | Poland              | DH008, DH024, DH040, DH066, DH115, DH120                                                         |
| 5         | Chulymskij          | Russia  | Omskij Mestnyj      | Russia              | DH011, DH025, DH029, DH041, DH042, DH058, DH068, DH116, DH121, DH125, DH131                      |
| 6         | Krupnosemjannyj     | Russia  | Brzybrodzka II      | Poland              | DH026, DH063, DH078, DH106, DH110                                                                |
| 7         | Came                | Germany | Volynskaja          | Former Soviet Union | DH031, DH069, DH076, DH090, DH098, DH119, DH123                                                  |
| 8         | Boha                | Denmark | Volynskaja          | Former Soviet Union | DH018, DH019, DH023, DH097                                                                       |
| 9         | Came                | Germany | Omskij              | Former Soviet Union | DH004, DH034, DH035, DH082, DH088, DH091, DH094, DH095, DH100, DH108, DH111, DH112, DH124, DH132 |
| 10        | Svalöf              | Sweden  | Ukrajinskij         | Former              | DH027, DH028, DH050, DH052, DH056, DH103,                                                        |

|    |              |                           |               |                        |                                                                                             |
|----|--------------|---------------------------|---------------|------------------------|---------------------------------------------------------------------------------------------|
|    |              |                           |               | Soviet Union           | DH105, DH117, DH130                                                                         |
| 11 | Calena       | Germany                   | Blaine Creek  | Greece                 | DH015, DH030, DH036,<br>DH047, DH080, DH083,<br>DH084, DH101, DH114,<br>DH134, DH135, DH136 |
| 12 | Zavolzskij   | Former<br>Soviet<br>Union | Sortandinskij | Former<br>Soviet Union | DH021, DH039, DH044,<br>DH045, DH059, DH067,<br>DH081, DH099, DH102,<br>DH126               |
| 13 | VNIIMK 17    | Former<br>Soviet<br>Union | Borowska      | Poland                 | DH048, DH057, DH074,<br>DH075, DH085, DH127                                                 |
| 14 | Voronezh 349 | Former<br>Soviet<br>Union | Czestochowska | Poland                 | DH010, DH016, DH049,<br>DH054, DH055, DH061,<br>DH109, DH133                                |
| 15 | Lindo        | Germany                   | Ukrajinskaja  | Former<br>Soviet Union | DH012, DH013, DH033,<br>DH053, DH064, DH065,<br>DH072, DH092, DH107,<br>DH122, DH128        |

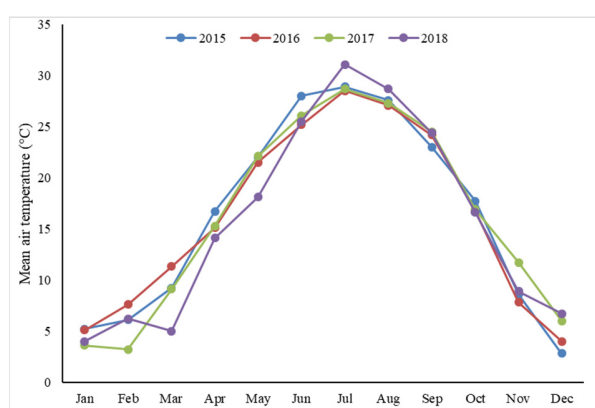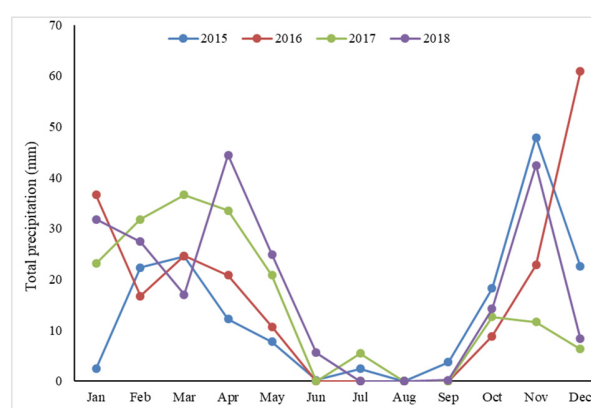

**Figure S2.** Main meteorological data (mean air temperature and total precipitation) for Karaj station during 2015-2018.

**Table S2.** Soil characteristics of the experimental site taken from 0-30 cm in the two different cropping years.

| Cropping<br>year | Clay<br>(%) | Silt<br>(%) | Sand<br>(%) | pH   | N<br>(%) | P<br>(mg/kg) | K<br>(mg/kg) | Organic carbon<br>(%) |
|------------------|-------------|-------------|-------------|------|----------|--------------|--------------|-----------------------|
| 2015-2016        | 24          | 50          | 26          | 7.56 | 0.072    | 7.71         | 173          | 0.51                  |
| 2017-2018        | 25          | 51          | 24          | 7.73 | 0.065    | 8.48         | 176          | 0.54                  |

| Block 1 | Block 2 | Block 3 | Block 4 | Block 5 | Block 6 | Block 7 | Block 8 |
|---------|---------|---------|---------|---------|---------|---------|---------|
| 28      | 75      | 136     | 36      | 69      | 21      | 57      | 103     |
| 112     | 19      | 88      | 129     | 52      | 87      | 104     | 10      |
| 10      | 71      | 70      | 53      | 20      | 35      | 136     | 4       |
| 32      | 93      | 106     | 90      | 105     | 91      | 72      | 56      |
| 8       | 10      | 6       | 58      | 121     | 10      | 37      | 25      |
| 51      | 125     | 39      | 122     | 136     | 12      | 55      | 124     |
| 38      | 59      | 129     | 120     | 74      | 108     | 89      | 136     |
| 96      | 24      | 92      | 107     | 18      | 40      | 129     | 22      |
| 129     | 123     | 136     | 23      | 129     | 86      | 44      | 126     |
| 73      | 117     | 42      | 136     | 127     | 135     | 110     | 77      |
| 29      | 27      | 98      | 113     | 10      | 95      | 17      | 9       |
| 66      | 136     | 109     | 61      | 78      | 7       | 2       | 31      |
| 134     | 1       | 45      | 11      | 13      | 129     | 26      | 60      |
| 54      | 46      | 128     | 10      | 131     | 115     | 67      | 129     |
| 136     | 119     | 116     | 76      | 97      | 43      | 81      | 80      |
| 79      | 63      | 10      | 64      | 118     | 133     | 47      | 49      |
| 84      | 3       | 15      | 82      | 129     | 48      | 130     | 99      |
| 100     | 33      | 132     | 10      | 34      | 50      | 65      | 62      |
| 41      | 83      | 68      | 16      | 114     | 102     | 10      | 94      |
| 111     | 129     | 5       | 101     | 85      | 136     | 30      | 14      |

**Figure S3.** Augmented design for assessment of the 136 DH lines. Checks: DH10, DH129 and DH136. Different colors represent the three different checks.
